# Supplementary material for: Characterization of Silybum marianum and Silybum eburneum seed oils: Phytochemical profiles and antioxidant properties supporting important nutritional interests
Source: PubMed Central journal article supplement (PMC11178192; doi:10.1371/journal.pone.0304021), 2024-06-14
Supplement: pone.0304021.s001.pdf [file pone.0304021.s001.pdf]

**S1\_Table.** Data of fatty acids profile of *S. marianum*, *S. eburneum*, and commercial *S. marianum* seed oils (%)

| Fatty acids                                | <i>S. marianum</i> |        |        | <i>S. eburneum</i> |        |        | <i>S. marianum</i><br>commercial<br>(Compagnie des<br>sens) |        |        |
|--------------------------------------------|--------------------|--------|--------|--------------------|--------|--------|-------------------------------------------------------------|--------|--------|
|                                            | 1                  | 2      | 3      | 1                  | 2      | 3      | 1                                                           | 2      | 3      |
| <b>SFA</b>                                 |                    |        |        |                    |        |        |                                                             |        |        |
| <i>Lauric acid (C12:0)</i>                 | 1.466              | 0.010  | 0.738  | 1.345              | 0.010  | 0.678  | 0.010                                                       | 0.011  | 0.010  |
| <i>Myristic Acid (C14:0)</i>               | 0.086              | 0.096  | 0.091  | 0.126              | 0.055  | 0.090  | 0.100                                                       | 0.105  | 0.095  |
| <i>Pentadecylic acid (C15:0)</i>           | 0.020              | 0.027  | 0.024  | 0.021              | 0.024  | 0.023  | 0.010                                                       | 0.011  | 0.010  |
| <i>Palmitic acid (C16:0)</i>               | 17.553             | 8.627  | 13.090 | 13.822             | 11.601 | 12.712 | 9.120                                                       | 9.576  | 8.664  |
| <i>Margaric acid (C17:0)</i>               | 0.049              | 0.098  | 0.074  | 0.060              | 0.075  | 0.068  | 0.080                                                       | 0.084  | 0.076  |
| <i>Stearic acid (C18:0)</i>                | 5.200              | 5.397  | 5.299  | 7.637              | 3.063  | 5.350  | 13.510                                                      | 14.186 | 12.835 |
| <i>Arachidic acid (C20:0)</i>              | 1.376              | 3.170  | 2.273  | 2.710              | 1.314  | 2.012  | 3.770                                                       | 3.959  | 3.582  |
| <i>Heneicosanoic acid (C21:0)</i>          | 0.023              | 0.010  | 0.017  | 0.030              | 0.010  | 0.020  | 0.010                                                       | 0.011  | 0.010  |
| <i>Behenic acid (C22:0)</i>                | 0.339              | 2.295  | 1.317  | 0.948              | 0.589  | 0.768  | 2.690                                                       | 2.825  | 2.556  |
| <i>Lignoceric acid(C24:0)</i>              | 0.104              | 0.451  | 0.277  | 0.323              | 0.120  | 0.222  | 0.730                                                       | 0.767  | 0.694  |
| <b>ΣSFA</b>                                | 26.216             | 20.183 | 23.199 | 27.022             | 16.863 | 21.942 | 30.030                                                      | 31.532 | 28.529 |
| <b>UFA</b>                                 |                    |        |        |                    |        |        |                                                             |        |        |
| <b>MUFA</b>                                |                    |        |        |                    |        |        |                                                             |        |        |
| <i>(Z)-7-hexadecenoic acid (C16:1 n-9)</i> | 0.019              | 0.022  | 0.020  | 0.016              | 0.000  | 0.008  | 0.070                                                       | 0.074  | 0.067  |
| <i>Palmitoleic acid (C16:1 n-7)</i>        | 0.077              | 0.093  | 0.085  | 0.063              | 0.093  | 0.078  | 0.010                                                       | 0.011  | 0.010  |
| <i>Margaric acid (C17:1)</i>               | 0.020              | 0.010  | 0.015  | 0.026              | 0.010  | 0.018  | 0.020                                                       | 0.021  | 0.019  |
| <i>Oleic acid (C18:1 n-9)</i>              | 6.022              | 27.936 | 16.979 | 8.905              | 17.660 | 13.282 | 24.790                                                      | 26.030 | 23.551 |
| <i>Trans-vaccenic acid (C18:1 n-7)</i>     | 0.963              | 0.813  | 0.888  | 0.897              | 0.722  | 0.809  | 0.720                                                       | 0.756  | 0.684  |
| <i>Cis-11-eicosenoic acid (C20:1 n-9)</i>  | 0.204              | 0.786  | 0.495  | 0.467              | 0.277  | 0.372  | 0.950                                                       | 0.998  | 0.903  |
| <i>C24:1 n-9</i>                           | 0.058              | 0.010  | 0.034  | 0.023              | 0.010  | 0.017  | 0.010                                                       | 0.011  | 0.010  |
| <b>ΣMUFA</b>                               | 7.363              | 29.671 | 18.517 | 10.397             | 18.771 | 14.584 | 26.570                                                      | 27.899 | 25.242 |
| <b>PUFA</b>                                |                    |        |        |                    |        |        |                                                             |        |        |

|                                                           |        |        |        |        |        |        |        |        |        |
|-----------------------------------------------------------|--------|--------|--------|--------|--------|--------|--------|--------|--------|
| <i>Linoleic acid<br/>(C18:2 n-6)</i>                      | 59.435 | 50.014 | 54.725 | 45.070 | 63.995 | 54.532 | 37.370 | 39.239 | 35.502 |
| <i><math>\alpha</math>-linolenic acid<br/>(C18:3n-3)</i>  | 0.010  | 0.173  | 0.091  | 0.010  | 0.412  | 0.211  | 0.320  | 0.336  | 0.304  |
| <i><math>\gamma</math>-linolenic acid<br/>(C18:3 n-6)</i> | 1.970  | 0.010  | 0.990  | 0.500  | 0.010  | 0.255  | 0.010  | 0.011  | 0.010  |
| <i>Dihomo-gamma-<br/>linolenic acid<br/>(C20:2 n-6)</i>   | 0.042  | 0.010  | 0.026  | 0.050  | 0.010  | 0.030  | 0.010  | 0.011  | 0.010  |
| <b><math>\Sigma</math>PUFA</b>                            | 61.457 | 50.207 | 55.832 | 45.630 | 64.427 | 55.028 | 37.710 | 39.596 | 35.825 |
| <b><math>\Sigma</math>UFA</b>                             | 68.820 | 79.878 | 74.349 | 56.027 | 83.198 | 69.613 | 64.280 | 67.494 | 61.066 |
