# Supplementary material for: Characterization of Silybum marianum and Silybum eburneum seed oils: Phytochemical profiles and antioxidant properties supporting important nutritional interests
Source: PubMed Central journal article supplement (PMC11178192; doi:10.1371/journal.pone.0304021), 2024-06-14
Supplement: pone.0304021.s002.pdf [file pone.0304021.s002.pdf]

**S2\_Table.** Data of phytosterol profile of *S. marianum*, *S. eburneum*, and commercial *S. marianum* seed oils (mg/Kg of oil)

| Phytosterols                     | <i>S. marianum</i> |          |          | <i>S. eburneum</i> |          |          | <i>S. marianum</i> commercial<br>(Compagnie des sens) |          |          |
|----------------------------------|--------------------|----------|----------|--------------------|----------|----------|-------------------------------------------------------|----------|----------|
|                                  | 1                  | 2        | 3        | 1                  | 2        | 3        | 1                                                     | 2        | 3        |
| <i>Unknown 1</i>                 | ND                 | ND       | ND       | 35.843             | 36.918   | 34.768   | 18.375                                                | 18.926   | 17.824   |
| <i>Campesterol</i>               | 195.687            | 201.557  | 189.816  | 556.087            | 572.769  | 539.404  | 266.298                                               | 274.287  | 258.309  |
| <i>Stigmasterol</i>              | 345.965            | 356.344  | 335.586  | 269.951            | 278.050  | 261.853  | 301.945                                               | 311.003  | 292.886  |
| <i>Unknown 2</i>                 | 14.489             | 14.924   | 14.054   | 88.234             | 90.881   | 85.587   | 91.572                                                | 94.319   | 88.825   |
| $\Delta^7$ <i>Campesterol</i>    | 140.933            | 145.161  | 136.705  | 93.005             | 95.796   | 90.215   | 135.711                                               | 139.782  | 131.640  |
| <i>Sitosterol</i>                | 1511.815           | 1557.170 | 1466.461 | 1861.892           | 1917.748 | 1806.035 | 1598.607                                              | 1646.565 | 1550.648 |
| $\Delta^5$ <i>Avenasterol</i>    | 64.847             | 66.792   | 62.901   | 178.072            | 183.414  | 172.730  | 63.110                                                | 65.003   | 61.216   |
| $\beta$ <i>Amyrin</i>            | 215.659            | 222.129  | 209.190  | 116.458            | 119.952  | 112.964  | 151.926                                               | 156.484  | 147.369  |
| <i>Unknown 3</i>                 | 63.056             | 64.948   | 61.164   | 34.342             | 35.373   | 33.312   | 47.828                                                | 49.263   | 46.393   |
| $\Delta^7$ <i>Stigmasterol</i>   | 1333.318           | 1373.318 | 1293.319 | 365.820            | 376.795  | 354.846  | 1167.760                                              | 1202.792 | 1132.727 |
| $\Delta^7$ <i>Avenasterol</i>    | 83.185             | 85.681   | 80.690   | 141.896            | 146.153  | 137.639  | 27.986                                                | 28.826   | 27.147   |
| <i>24-methylene cycloartenol</i> | 85.766             | 88.339   | 83.193   | 130.769            | 134.692  | 126.846  | 94.137                                                | 96.961   | 91.313   |
| <i>Epoxytosterol</i>             | 94.530             | 97.366   | 91.694   | 166.412            | 171.404  | 161.420  | 177.236                                               | 182.553  | 171.919  |
| <i>Citrostadienol</i>            | 27.641             | 28.470   | 26.812   | 43.767             | 45.080   | 42.454   | 67.169                                                | 69.184   | 65.154   |
| <i>Cholesterol</i>               | 323.113            | 332.806  | 313.419  | 646.170            | 665.556  | 626.785  | 560.541                                               | 577.357  | 543.725  |
| <b>Total content</b>             | 4500.004           | 4635.005 | 4365.004 | 4728.720           | 4870.581 | 4586.858 | 4770.201                                              | 4913.307 | 4627.095 |
