# Supplementary material for: Characterization of Silybum marianum and Silybum eburneum seed oils: Phytochemical profiles and antioxidant properties supporting important nutritional interests
Source: PubMed Central journal article supplement (PMC11178192; doi:10.1371/journal.pone.0304021), 2024-06-14
Supplement: pone.0304021.s003.pdf [file pone.0304021.s003.pdf]

**S3\_Tabel. Data of tocopherols content of *S. marianum* (SM), *S. eburneum* (SE), and *S. marianum* commercial (SMC) seed oils (mg tocopherol/Kg of oil).**

|            | <b>Repetition</b> | <b><math>\delta</math>-tocopherol</b> | <b><math>\gamma</math>-tocopherol</b> | <b><math>\alpha</math>-tocopherol</b> | <b>Total tocopherol content</b> |
|------------|-------------------|---------------------------------------|---------------------------------------|---------------------------------------|---------------------------------|
| <b>SM</b>  | <b>1</b>          | 4.333                                 | 72.129                                | 385.017                               | 461.479                         |
|            | <b>2</b>          | 4.508                                 | 71.983                                | 385.948                               | 462.439                         |
|            | <b>3</b>          | 4.888                                 | 79.514                                | 431.535                               | 515.937                         |
| <b>SE</b>  | <b>1</b>          | 2.280                                 | 143.340                               | 202.598                               | 348.217                         |
|            | <b>2</b>          | 2.300                                 | 141.846                               | 203.117                               | 347.263                         |
|            | <b>3</b>          | 2.697                                 | 169.148                               | 240.936                               | 412.781                         |
| <b>SMC</b> | <b>1</b>          | 2.995                                 | 80.536                                | 545.273                               | 628.804                         |
|            | <b>2</b>          | 3.132                                 | 82.799                                | 559.129                               | 645.060                         |
|            | <b>3</b>          | 2.878                                 | 81.360                                | 548.600                               | 632.838                         |
