# Supplementary material for: Characterization of Silybum marianum and Silybum eburneum seed oils: Phytochemical profiles and antioxidant properties supporting important nutritional interests
Source: PubMed Central journal article supplement (PMC11178192; doi:10.1371/journal.pone.0304021), 2024-06-14
Supplement: pone.0304021.s004.pdf [file pone.0304021.s004.pdf]

**S5\_Table.** Data of phenolic profile of *S. marianum*, *S. eburneum*, and *S. marianum* commercial seed oils

|                                                              | <i>S. marianum</i> |          |          | <i>S. eburneum</i> |          |          | <i>S. marianum</i><br>commercial<br>(Compagnie des sens) |          |          |
|--------------------------------------------------------------|--------------------|----------|----------|--------------------|----------|----------|----------------------------------------------------------|----------|----------|
| <b>Colorimetric quantification</b>                           |                    |          |          |                    |          |          |                                                          |          |          |
| <b>Repetition</b>                                            | <b>1</b>           | <b>2</b> | <b>3</b> | <b>1</b>           | <b>2</b> | <b>3</b> | <b>1</b>                                                 | <b>2</b> | <b>3</b> |
| <i>Total phenols content (mg GAE/100g of oil)</i>            | 5.929              | 4.973    | 4.017    | 5.212              | 4.141    | 5.022    | 5.209                                                    | 7.535    | 5.768    |
| <i>Total flavonoids content (mg QRE/100g of oil)</i>         | 22.612             | 19.133   | 20.873   | 15.049             | 18.131   | 15.500   | 20.022                                                   | 18.048   | 20.586   |
| <i>Total carotenoids content (mg/kg)</i>                     | 0.426              | 0.174    | 0.155    | 0.185              | 0.185    | 0.204    | 0.215                                                    | 0.200    | 0.264    |
| <b>HPLC quantification</b>                                   |                    |          |          |                    |          |          |                                                          |          |          |
| <b>Phenols acids (mg equivalent Quercetin / 100g of oil)</b> |                    |          |          |                    |          |          |                                                          |          |          |
| <i>Vanillin</i>                                              | 0.13               |          |          | 0.28               |          |          | 0.06                                                     |          |          |
| <i>Coumarin</i>                                              | 0.43               |          |          | ND                 |          |          | ND                                                       |          |          |
| <i>Silibinine</i>                                            | ND                 |          |          | ND                 |          |          | 0.36                                                     |          |          |
| <b>Peak at 48.1 min</b>                                      | 3.27               |          |          | ND                 |          |          | ND                                                       |          |          |
| <b>Peak at 48.9 min</b>                                      | 5.48               |          |          | ND                 |          |          | ND                                                       |          |          |
| <b>Sum peak at à 280 nm</b>                                  | 11.81              |          |          | 1.94               |          |          | 2.54                                                     |          |          |
