# Supplementary material for: Characterization of Silybum marianum and Silybum eburneum seed oils: Phytochemical profiles and antioxidant properties supporting important nutritional interests
Source: PubMed Central journal article supplement (PMC11178192; doi:10.1371/journal.pone.0304021), 2024-06-14
Supplement: pone.0304021.s005.pdf [file pone.0304021.s005.pdf]

**S5\_Table.** Data of Antioxidant activities of *S. marianum*, *S. eburneum*, and *S. marianum* commercial seed oils

|                                                                        | repetition | Total                                          | DPPH                    | FRAP                    | KRL test          |                  |
|------------------------------------------------------------------------|------------|------------------------------------------------|-------------------------|-------------------------|-------------------|------------------|
|                                                                        |            | antioxidant activity<br>(mg GAE/ 100 g of oil) | (mg TRE / 100 g of oil) | (mg TRE / 100 g of oil) | mg TRE / g of oil | mg GAE/ g of oil |
| <i>S. marianum</i>                                                     | 1          | 26.901                                         | 7.021                   | 0.678                   | 252.877           | 101.620          |
|                                                                        | 2          | 22.654                                         | 6.120                   | 0.533                   | 210.198           | 84.470           |
|                                                                        | 3          | 19.114                                         | 6.645                   | 0.557                   | 250.283           | 100.000          |
| <i>S. eburneum</i>                                                     | 1          | 21.286                                         | 5.832                   | 0.660                   | 124.548           | 50.050           |
|                                                                        | 2          | 12.772                                         | 6.171                   | 1.415                   | 115.675           | 46.485           |
|                                                                        | 3          | 17.029                                         | 6.924                   | 0.346                   | 171.389           | 68.478           |
| <i>S. marianum</i><br><i>commercial</i><br><i>(Compagnie des sens)</i> | 1          | 16.527                                         | 1.315                   | 0.177                   | 174.776           | 72.247           |
|                                                                        | 2          | 18.180                                         | 1.844                   | 0.189                   | 116.020           | 54.391           |
|                                                                        | 3          | 17.904                                         | 2.867                   | 0.153                   | 139.622           | 60.736           |
