# Supplementary material for: Characterization of Silybum marianum and Silybum eburneum seed oils: Phytochemical profiles and antioxidant properties supporting important nutritional interests
Source: PubMed Central journal article supplement (PMC11178192; doi:10.1371/journal.pone.0304021), 2024-06-14
Supplement: pone.0304021.s006.pdf [file pone.0304021.s006.pdf]

**S6\_Table: Data of valuation of the cytotoxic effects of *Silybum* seed oils (SMSO, SESO, and SMCSO) and oxysterols (7KC,7 $\beta$ -OHC) on THP-1 cells with the FDA test after 24 hours of treatment.**

**DMSO**

| <b>Repetition</b> | <b>Control</b> | <b>0.041%</b> | <b>0.083%</b> | <b>0.166%</b> | <b>0.33%</b> | <b>0.66%</b> | <b>1.33%</b> |
|-------------------|----------------|---------------|---------------|---------------|--------------|--------------|--------------|
| <b>1</b>          | 99.965         | 101.242       | 99.195        | 97.793        | 91.917       | 89.423       | 89.391       |
| <b>2</b>          | 100.619        | 100.531       | 100.701       | 98.300        | 94.460       | 89.805       | 88.763       |
| <b>3</b>          | 99.416         | 102.497       | 101.622       | 100.294       | 90.450       | 89.867       | 88.494       |

**Ethanol**

| <b>Repetition</b> | <b>Control</b> | <b>0.0325%</b> | <b>0.065%</b> | <b>0.130%</b> | <b>0.260%</b> | <b>0.520%</b> | <b>1.04%</b> |
|-------------------|----------------|----------------|---------------|---------------|---------------|---------------|--------------|
| <b>1</b>          | 104.327        | 107.300        | 97.795        | 98.071        | 91.717        | 95.961        | 92.444       |
| <b>2</b>          | 96.620         | 97.714         | 98.676        | 99.285        | 90.857        | 90.487        | 84.937       |
| <b>3</b>          | 99.053         | 104.224        | 105.739       | 96.990        | 90.816        | 89.599        | 93.055       |

**7KC**

| <b>Repetition</b> | <b>Control</b> | <b>15.625 (μM)</b> | <b>31.25 (μM)</b> | <b>62.5(μM)</b> | <b>125 (μM)</b> | <b>250 (μM)</b> | <b>500 (μM)</b> |
|-------------------|----------------|--------------------|-------------------|-----------------|-----------------|-----------------|-----------------|
| <b>1</b>          | 96.748         | 94.883             | 79.710            | 67.951          | 49.755          | 42.252          | 34.427          |
| <b>2</b>          | 99.908         | 77.072             | 76.717            | 65.690          | 50.244          | 43.193          | 36.822          |
| <b>3</b>          | 103.344        | 91.615             | 66.990            | 55.670          | 42.545          | 43.5146         | 34.945          |

**7β-OH**

| <b>Repetition</b> | <b>Control</b> | <b>15.625 (μM)</b> | <b>31.25 (μM)</b> | <b>62.5(μM)</b> | <b>125 (μM)</b> | <b>250 (μM)</b> | <b>500 (μM)</b> |
|-------------------|----------------|--------------------|-------------------|-----------------|-----------------|-----------------|-----------------|
| <b>1</b>          | 97.962         | 100.694            | 83.502            | 50.748          | 39.819          | 33.953          | 24.062          |
| <b>2</b>          | 105.269        | 100.576            | 84.443            | 51.549          | 38.732          | 33.783          | 21.652          |
| <b>3</b>          | 96.769         | 100.433            | 87.282            | 50.632          | 36.206          | 35.505          | 22.110          |

**SMSO**

| <b>Repetition</b> | <b>Control</b> | <b>25 (μg/mL)</b> | <b>50 (μg/mL)</b> | <b>100 (μg/mL)</b> | <b>200 (μg/mL)</b> | <b>400 (μg/mL)</b> | <b>800 (μg/mL)</b> |
|-------------------|----------------|-------------------|-------------------|--------------------|--------------------|--------------------|--------------------|
| <b>1</b>          | 99.895         | 119.879           | 115.720           | 112.537            | 108.449            | 108.106            | 82.935             |
| <b>2</b>          | 96.441         | 116.382           | 107.805           | 113.519            | 112.821            | 107.343            | 80.081             |
| <b>3</b>          | 103.664        | 115.912           | 108.062           | 113.670            | 105.154            | 107.337            | 83.361             |

### SESO

| Repetition | Control | 25 (µg/mL) | 50 (µg/mL) | 100 (µg/mL) | 200 (µg/mL) | 400 (µg/mL) | 800 (µg/mL) |
|------------|---------|------------|------------|-------------|-------------|-------------|-------------|
| 1          | 99.882  | 114.024    | 102.853    | 102.232     | 94.358      | 84.361      | 65.041      |
| 2          | 100.972 | 108.447    | 107.142    | 110.021     | 93.000      | 83.116      | 60.444      |
| 3          | 99.145  | 108.564    | 107.512    | 97.208      | 92.016      | 81.529      | 62.346      |

### SMCSO

| Repetition | Control | 25 (µg/mL) | 50 (µg/mL) | 100 (µg/mL) | 200 (µg/mL) | 400 (µg/mL) | 800 (µg/mL) |
|------------|---------|------------|------------|-------------|-------------|-------------|-------------|
| 1          | 98.660  | 99.720     | 100.948    | 98.415      | 95.897      | 90.227      | 86.702      |
| 2          | 98.172  | 101.281    | 104.855    | 97.955      | 92.133      | 89.839      | 88.266      |
| 3          | 103.167 | 108.719    | 98.940     | 105.607     | 96.142      | 87.218      | 86.646      |
