# Supplementary material for: Characterization of Silybum marianum and Silybum eburneum seed oils: Phytochemical profiles and antioxidant properties supporting important nutritional interests
Source: PubMed Central journal article supplement (PMC11178192; doi:10.1371/journal.pone.0304021), 2024-06-14
Supplement: pone.0304021.s007.pdf [file pone.0304021.s007.pdf]

**S7\_ Table. Data of effect of *S. marianum*, *S. eburneum*, and *S. marianum* commercial seed oils on oxysterols (7-cetocholesterol and 7 $\beta$ -hydroxycholesterol) induced ROS overproduction in THP-1 cells.**

| Repetition                                          | DHE positive cells (%) |       |       |
|-----------------------------------------------------|------------------------|-------|-------|
|                                                     | 1                      | 2     | 3     |
| Control                                             | 20.04                  | 22.32 | 23.42 |
| DMSO (0.166%)                                       | 25.29                  | 20.14 | 22.61 |
| Eth (0.104%)                                        | 22.57                  | 21.35 | 22.41 |
| DMSO (0.166%) +Eth (0.104%)                         | 20.14                  | 23.60 | 21.87 |
| $\alpha$ -tocopherol(400 $\mu$ M)                   | 23.82                  | 21.20 | 27.02 |
| SMSO (100 $\mu$ g/ml)                               | 21.86                  | 26.81 | 24.34 |
| SESO (100 $\mu$ g/ml)                               | 19.84                  | 26.54 | 23.19 |
| SMCSO (100 $\mu$ g/ml)                              | 19.53                  | 26.28 | 22.91 |
| 7KC (62.5 $\mu$ M)                                  | 33.58                  | 35.02 | 34.30 |
| 7KC+ $\alpha$ -tocopherol (400 $\mu$ M)             | 24.74                  | 26.67 | 22.81 |
| 7KC+ SMSO (100 $\mu$ g/ml)                          | 26.58                  | 28.65 | 24.51 |
| 7KC+ SESO (100 $\mu$ g/ml)                          | 27.69                  | 29.85 | 25.53 |
| 7KC+SMCSO (100 $\mu$ g/ml)                          | 23.88                  | 25.74 | 22.02 |
| 7 $\beta$ -OHC (62.5 $\mu$ M)                       | 42.90                  | 46.00 | 44.45 |
| 7 $\beta$ -OHC + $\alpha$ -tocopherol (400 $\mu$ M) | 32.10                  | 34.60 | 29.60 |
| 7 $\beta$ -OHC + SMSO (100 $\mu$ g/ml)              | 27.20                  | 29.32 | 25.08 |
| 7 $\beta$ -OHC + SESO (100 $\mu$ g/ml)              | 25.80                  | 27.81 | 23.79 |
| 7 $\beta$ -OHC + SMCSO (100 $\mu$ g/ml)             | 28.30                  | 30.51 | 26.09 |
