# Supplementary material for: Characterization of Silybum marianum and Silybum eburneum seed oils: Phytochemical profiles and antioxidant properties supporting important nutritional interests
Source: PubMed Central journal article supplement (PMC11178192; doi:10.1371/journal.pone.0304021), 2024-06-14
Supplement: pone.0304021.s008.pdf [file pone.0304021.s008.pdf]

**S8\_Table. Data of Principal Component Analysis (PCA) (A) and Heatmap (B) of lipids profiles (fatty acids, phytosterols, and tocopherols), phenolic profiles (total phenols, flavonoids, and carotenoids content) and antioxidant activities (DPPH, FRAP, TOA, and KRL) of the three oils.**

|                        | <b>SESO</b> | <b>SMSO</b> | <b>SMCSO</b> |
|------------------------|-------------|-------------|--------------|
| <b>TPC</b>             | 4.792       | 4.973       | 6.171        |
| <b>Flav</b>            | 16.226      | 20.873      | 19.552       |
| <b>Cart</b>            | 0.191       | 0.252       | 0.226        |
| <b>TOA</b>             | 17.029      | 22.890      | 17.537       |
| <b>DPPH</b>            | 6.309       | 6.595       | 2.009        |
| <b>FRAP</b>            | 0.807       | 0.589       | 0.173        |
| <b>KRL(T)</b>          | 137.204     | 237.786     | 143.473      |
| <b>KRL(G)</b>          | 55.004      | 95.363      | 62.458       |
| <b>δ-toco</b>          | 2.425       | 4.577       | 3.002        |
| <b>γ-toco</b>          | 151.445     | 74.542      | 81.565       |
| <b>α-toco</b>          | 215.550     | 400.833     | 551.001      |
| <b>∑Toco</b>           | 369.420     | 479.952     | 635.568      |
| <b>C16:0</b>           | 12.712      | 13.090      | 9.120        |
| <b>C18:0</b>           | 5.350       | 5.299       | 13.510       |
| <b>∑SFA</b>            | 21.942      | 23.199      | 30.030       |
| <b>C18:1 n-9</b>       | 13.282      | 16.979      | 24.790       |
| <b>∑MUFA</b>           | 14.584      | 18.517      | 26.570       |
| <b>C18:2 n-6</b>       | 54.532      | 54.725      | 37.370       |
| <b>∑PUFA</b>           | 55.028      | 55.832      | 37.710       |
| <b>∑UFA</b>            | 69.613      | 74.349      | 64.280       |
| <b>Campesterol</b>     | 556.087     | 195.687     | 266.298      |
| <b>Stigmasterol</b>    | 269.951     | 345.965     | 301.945      |
| <b>Δ7 campesterol</b>  | 93.005      | 140.933     | 135.711      |
| <b>Sitosterol</b>      | 1861.892    | 1511.815    | 1598.607     |
| <b>b-amyrin</b>        | 116.458     | 215.659     | 151.926      |
| <b>Δ7 stigmastenol</b> | 365.820     | 1333.318    | 1167.760     |
| <b>Cholesterol</b>     | 646.170     | 323.113     | 560.541      |
| <b>∑phyto</b>          | 4728.720    | 4500.004    | 4770.201     |
